# Supplementary material for: Proteomic analysis of salt-stressed tomato (Solanum lycopersicum) seedlings: effect of genotype and exogenous application of glycinebetaine
Source: PubMed Central journal article supplement — J Exp Bot. 2009 Mar 30;60(7):2005–19. doi: 10.1093/jxb/erp075 (PMC2682497; doi:10.1093/jxb/erp075), 2009-03-30
Supplement: erp075_1.pdf [file erp075_1.pdf]

**Proteomic Analysis of Salt-stressed Tomato  
(*Lycopersicon esculentum*) Seedlings: Effect of  
Genotype and Exogenous Application of  
Glycinebetaine**

**Songbi Chen, Natan Gollop, Bruria Heuer**

Supplementary Material

**Supplementary table 1:** Identification of tomato protein induced during osmotic stresses. a) The numbering corresponds to the 2-D gel in Figures 3-8; b) Gi number in NCBI databases (2007/10/01); c) All proteins were identified by LC-ESI-MS. For each identified protein, the number of matched peptides was more than 1, and the scope of marched peptides was more than 70.

| Spot number <sup>a</sup> | GI Number <sup>b</sup> | Protein Name <sup>c</sup>                                                 | Identified peptides |       |        |                                            |
|--------------------------|------------------------|---------------------------------------------------------------------------|---------------------|-------|--------|--------------------------------------------|
|                          |                        |                                                                           | Number              | Score | Mass   | Sequence                                   |
| 1                        | 77554415               | Chaperone protein DnaK ( <i>Oryza sativa</i> (japonica cultivar-group))   | 1                   | 96    | 1472.8 | KQDITITGASTLPK                             |
|                          |                        |                                                                           | 2                   | 91    | 1595.7 | AKFEELC(+57)SDLIDR                         |
|                          |                        |                                                                           | 3                   | 92    | 1344.7 | QDITITGASTLPK                              |
|                          |                        |                                                                           | 4                   | 94    | 1396.6 | FEELC(+57)SDLIDR                           |
|                          |                        |                                                                           | 5                   | 71    | 728.4  | LVGQIAK                                    |
|                          |                        |                                                                           | 6                   | 95    | 1472.8 | KQDITITGASTLPK                             |
|                          |                        |                                                                           | 7                   | 78    | 761.4  | LTEAAEK                                    |
|                          |                        |                                                                           | 8                   | 93    | 1566.8 | AVVTVPAYFNDSQR                             |
|                          |                        |                                                                           | 9                   | 90    | 1595.7 | AKFEELC(+57)SDLIDR                         |
|                          |                        |                                                                           | 10                  | 77    | 861.4  | NTTLPTSK                                   |
|                          |                        |                                                                           | 11                  | 97    | 1723.9 | IINEPTAASLAYGFEK                           |
|                          |                        |                                                                           | 12                  | 76    | 2437.2 | SEVFSTAADGQTSVEINVLQGER                    |
| 2                        | 3492854                | Mitochondrial small heat shock protein ( <i>Lycopersicon esculentum</i> ) | 1                   | 79    | 1392.6 | MDM(+16)PGLDKENVK                          |
|                          |                        |                                                                           | 2                   | 98    | 1665.8 | GWDVKEDDNALYIK                             |
|                          |                        |                                                                           | 3                   | 90    | 1117.6 | LEIPQNIYK                                  |
|                          |                        |                                                                           | 4                   | 93    | 1228.7 | VAVEENTLIK                                 |
|                          |                        |                                                                           | 5                   | 96    | 1376.6 | MDMPGLDKENVK                               |
|                          |                        |                                                                           | 6                   | 97    | 1665.8 | GWDVKEDDNALYIK                             |
|                          |                        |                                                                           | 7                   | 90    | 1080.5 | EDDNALYIK                                  |
|                          |                        |                                                                           | 8                   | 72    | 2532.1 | SVSQLLNM(+16)M(+16)DQM(+16)M(+16)DSPFVAAPR |
| 3                        | 15080913               | Ferritin ( <i>Malus xiaojinensis</i> )                                    | 1                   | 94    | 1078.6 | ISEYVAQLR                                  |
|                          |                        |                                                                           | 2                   | 92    | 1639.8 | GDALYAM(+16)ELALSLEK                       |
| 4                        | 19317                  | Photosystem II 23 kDa protein ( <i>L. esculentum</i> )                    | 1                   | 87    | 1296.7 | HQLITATVNDGK                               |
|                          |                        |                                                                           | 2                   | 96    | 1306.6 | EYYVLSVLTR                                 |
|                          |                        |                                                                           | 3                   | 80    | 1384.7 | KFVENAATSFSIA                              |
|                          |                        |                                                                           | 4                   | 86    | 2127   | TADGDEGGKHLITATVNDGK                       |
|                          |                        |                                                                           | 5                   | 91    | 1572.7 | SITDYGSPPEFLSK                             |
|                          |                        |                                                                           | 6                   | 87    | 807.4  | VDYLLGK                                    |
|                          |                        |                                                                           | 7                   | 83    | 849.3  | TADGDEGGK                                  |
|                          |                        |                                                                           | 8                   | 93    | 2127   | TADGDEGGKHLITATVNDGK                       |
|                          |                        |                                                                           | 9                   | 72    | 1256.6 | FVENAATSFSIA                               |
| 5                        | 3341464                | Hsp20.1 protein ( <i>L. peruvianum</i> )                                  | 1                   | 94    | 901.5  | VLQISGER                                   |
|                          |                        |                                                                           | 2                   | 94    | 974.5  | FRLPENAK                                   |
|                          |                        |                                                                           | 3                   | 91    | 1502.8 | KEEVKVEIEDR                                |
|                          |                        |                                                                           | 4                   | 76    | 1071.6 | EEVKKPDVK                                  |
|                          |                        |                                                                           | 5                   | 81    | 1771.9 | VEIEEDRVLQISGER                            |
|                          |                        |                                                                           | 6                   | 86    | 1947   | ASM(+16)ENGVLTVTPKEEVK                     |
|                          |                        |                                                                           | 7                   | 94    | 1374.7 | EEVKVEIEDR                                 |
|                          |                        |                                                                           | 8                   | 70    | 713.4  | ADLPLGK                                    |
|                          |                        |                                                                           | 9                   | 95    | 1445.7 | ASMENGVLTVPK                               |
|                          |                        |                                                                           | 10                  | 98    | 1461.7 | ASM(+16)ENGVLTVTPK                         |
|                          |                        |                                                                           | 11                  | 89    | 2257.1 | EEVKVEIEDRVLQISGER                         |
|                          |                        |                                                                           | 12                  | 89    | 889.4  | VEIEEDR                                    |
|                          |                        |                                                                           | 13                  | 90    | 1931   | ASMENGVLTVPKKEEVK                          |
|                          |                        |                                                                           | 14                  | 89    | 1057.5 | ETPEAHVFK                                  |
| 6                        | 31088230               | Glyceraldehyde 3-phosphate dehydrogenase ( <i>L. esculentum</i> )         | 1                   | 76    | 659.4  | AGIALSK                                    |
|                          |                        |                                                                           | 2                   | 89    | 1434.7 | AASFNIIPSSTGAAK                            |
|                          |                        |                                                                           | 3                   | 92    | 1470.8 | VPTADVSVVDLTVR                             |
|                          |                        |                                                                           | 4                   | 88    | 767.4  | SSIFDAK                                    |
|                          |                        |                                                                           | 5                   | 99    | 2145   | GILGYTEDDVVSTDFVGDSSR                      |
| 7                        | 4836473                | 17.6 kD class I small heat shock protein ( <i>L. esculentum</i> )         | 1                   | 94    | 901.5  | VLQISGER                                   |
|                          |                        |                                                                           | 2                   | 94    | 974.5  | FRLPENAK                                   |
|                          |                        |                                                                           | 3                   | 95    | 1488.7 | KEEVKVEVEEDR                               |
|                          |                        |                                                                           | 4                   | 93    | 1057.5 | ETPEAHVFK                                  |
|                          |                        |                                                                           | 5                   | 99    | 1085.6 | EEVKKPEVK                                  |
|                          |                        |                                                                           | 6                   | 78    | 1947   | ASM(+16)ENGVLTVTPKKEEVK                    |
|                          |                        |                                                                           | 7                   | 98    | 1360.6 | EEVKVEVEEDR                                |

|    |          |                                                                                               |    |    |        |                                           |
|----|----------|-----------------------------------------------------------------------------------------------|----|----|--------|-------------------------------------------|
|    |          |                                                                                               | 8  | 70 | 713.4  | ADLPGLK                                   |
|    |          |                                                                                               | 9  | 95 | 1445.7 | ASMENGLTVTVPK                             |
|    |          |                                                                                               | 10 | 98 | 1461.7 | ASM(+16)ENGLTVTVPK                        |
|    |          |                                                                                               | 11 | 87 | 2243.1 | EEVKVEVEDRVLQISGER                        |
|    |          |                                                                                               | 12 | 96 | 1757.9 | VEVEDRVLQISGER                            |
|    |          |                                                                                               | 13 | 90 | 1931   | ASMENGLTVTVPKKEEVK                        |
|    |          |                                                                                               | 14 | 94 | 1941.9 | ELGFPSTNSGESSAFANTR                       |
| 8  | 77744859 | Temperature induced lipocalin' ( <i>L. esculentum</i> )                                       | 1  | 99 | 925.4  | GSIEGTAYK                                 |
|    |          |                                                                                               | 2  | 95 | 1023.5 | YLWILC(+57)R                              |
|    |          |                                                                                               | 3  | 88 | 1854.9 | QPHLDEEIIYNQLVEK                          |
|    |          |                                                                                               | 4  | 96 | 1255.6 | WYEIASFPSR                                |
|    |          |                                                                                               | 5  | 91 | 2391.1 | ATYTLNQDGTVHVLNETWSGGK                    |
|    |          |                                                                                               | 6  | 76 | 896.4  | EVGYDVSK                                  |
|    |          |                                                                                               | 7  | 90 | 2391.1 | ATYTLNQDGTVHVLNETWSGGK                    |
| 9  | 4836471  | 17.8 kD class I small heat shock protein ( <i>L. esculentum</i> )                             | 1  | 95 | 901.5  | VLQISGER                                  |
|    |          |                                                                                               | 2  | 86 | 1947   | ASM(+16)ENGLTVTVPKKEEVK                   |
|    |          |                                                                                               | 3  | 97 | 1445.7 | ASMENGLTVTVPK                             |
|    |          |                                                                                               | 4  | 99 | 1461.7 | ASM(+16)ENGLTVTVPK                        |
|    |          |                                                                                               | 5  | 94 | 1931   | ASMENGLTVTVPKKEEVK                        |
|    |          |                                                                                               | 6  | 97 | 1971.9 | ELGFPSTNSGESSAFANTR                       |
|    |          |                                                                                               | 7  | 99 | 2009.9 | SSSM(+16)FDPFSDVDFPFR                     |
|    |          |                                                                                               | 8  | 96 | 1057.5 | ETPEAHVFK                                 |
|    |          |                                                                                               | 9  | 91 | 3962.8 | SSSM(+16)FDPFSDVDFPFRFRELGFSTNSGESSAFANTR |
| 10 | 3676294  | Mitochondrial ATPase beta subunit ( <i>Nicotiana glauca</i> )                                 | 1  | 82 | 1869.9 | M(+16)LSPHILGEDHYNTAR                     |
|    |          |                                                                                               | 2  | 99 | 1393.7 | ESINSFQGVLDGK                             |
|    |          |                                                                                               | 3  | 88 | 2148   | NLQDIIAILGM(+16)DELSEDDK                  |
|    |          |                                                                                               | 4  | 92 | 2690.3 | NLQDIIAILGMDELSEDDKMTVAR                  |
|    |          |                                                                                               | 5  | 86 | 2706.3 | NLQDIIAILGM(+16)DELSEDDKMTVAR             |
|    |          |                                                                                               | 6  | 94 | 2722.3 | NLQDIIAILGM(+16)DELSEDDKM(+16)TVAR        |
|    |          |                                                                                               | 7  | 92 | 2379.1 | YDDLSEQSFYVGGIDEVIAK                      |
|    |          |                                                                                               | 8  | 90 | 2395.1 | YDDLSEQSFYM(+16)VGGIDEVIAK                |
| 11 | 3790441  | Chaperonin 60 alpha subunit ( <i>Canavalia lineata</i> )                                      | 1  | 99 | 898.6  | GILNVAAIK                                 |
|    |          |                                                                                               | 2  | 92 | 1043.6 | VVNDGVTIAR                                |
|    |          |                                                                                               | 3  | 96 | 1182.7 | LADAVGLTLGPR                              |
|    |          |                                                                                               | 4  | 91 | 1192.6 | DSTTHADAASK                               |
|    |          |                                                                                               | 5  | 84 | 802.4  | VLVTDQK                                   |
|    |          |                                                                                               | 6  | 96 | 1636.8 | TNDSAGDGTASVLR                            |
|    |          |                                                                                               | 7  | 97 | 1754.9 | AIELPDAMENAGALIR                          |
|    |          |                                                                                               | 8  | 96 | 1770.9 | AIELPDAM(+16)ENAGALIR                     |
|    |          |                                                                                               | 9  | 88 | 940.6  | DIIPLEK                                   |
| 12 | 11991527 | Mitochondrial formate dehydrogenase precursor ( <i>Solanum tuberosum</i> )                    | 1  | 94 | 955.6  | GVLIVNNAR                                 |
|    |          |                                                                                               | 2  | 78 | 1048.5 | DGELAPQYR                                 |
|    |          |                                                                                               | 3  | 95 | 1591.8 | LKM(+16)DSELENQIGAK                       |
|    |          |                                                                                               | 4  | 91 | 1157.6 | GHQYIVTPDK                                |
|    |          |                                                                                               | 5  | 99 | 1334.6 | MDSELENQIGAK                              |
|    |          |                                                                                               | 6  | 96 | 1350.6 | M(+16)DSELENQIGAK                         |
|    |          |                                                                                               | 7  | 87 | 1381.6 | GEDFFAENYIVK                              |
|    |          |                                                                                               | 8  | 94 | 2215   | GHQYIVTPDKKEGPDC(+57)ELEK                 |
|    |          |                                                                                               | 9  | 99 | 1501.8 | C(+57)DIVVINTPLTEK                        |
|    |          |                                                                                               | 10 | 83 | 795.4  | AYDLEGK                                   |
|    |          |                                                                                               | 11 | 92 | 2649.3 | AAAAAGLTVAEVTGSNTVSVAEDELM(+16)R          |
|    |          |                                                                                               | 12 | 89 | 895.4  | FEEDLDK                                   |
|    |          |                                                                                               | 13 | 90 | 1907   | NLQLLLTAGIGSDHVDLK                        |
|    |          |                                                                                               | 14 | 80 | 2454.1 | ANEYAE MNPNFLGC(+57)AENALGIR              |
| 13 | 53830834 | Osmotin-like protein ( <i>S. phureja</i> )                                                    | 1  | 86 | 1111.4 | TNC(+57)NFDGAGR                           |
|    |          |                                                                                               | 2  | 96 | 1726.6 | GWC(+57)QTGDC(+57)GGVLEC(+57)K            |
|    |          |                                                                                               | 3  | 81 | 2181.9 | C(+57)HPIQC(+57)VANINGEC(+57)PGSLR        |
|    |          |                                                                                               | 4  | 81 | 3134.2 | C(+57)PDAYSYPQDDPTSTFTC(+57)QSWTTDYK      |
| 14 | 4836469  | 17.7 kD class I small heat shock protein ( <i>L. esculentum</i> )                             | 1  | 95 | 901.5  | VLQISGER                                  |
|    |          |                                                                                               | 2  | 93 | 974.5  | FRLPENAK                                  |
|    |          |                                                                                               | 3  | 86 | 1947   | ASM(+16)ENGLTVTVPKKEEVK                   |
|    |          |                                                                                               | 4  | 89 | 1360.6 | EEVKVEVEDR                                |
|    |          |                                                                                               | 5  | 97 | 1445.7 | ASMENGLTVTVPK                             |
|    |          |                                                                                               | 6  | 99 | 1461.7 | ASM(+16)ENGLTVTVPK                        |
|    |          |                                                                                               | 7  | 94 | 1931   | ASMENGLTVTVPKKEEVK                        |
|    |          |                                                                                               | 8  | 97 | 1971.9 | ELGFPSTNSGESSAFANTR                       |
|    |          |                                                                                               | 9  | 99 | 1993.9 | SSSMFDPFSDVDFPFR                          |
|    |          |                                                                                               | 10 | 99 | 2009.9 | SSSM(+16)FDPFSDVDFPFR                     |
|    |          |                                                                                               | 11 | 96 | 1057.5 | ETPEAHVFK                                 |
|    |          |                                                                                               | 12 | 91 | 3962.8 | SSSM(+16)FDPFSDVDFPFRFRELGFSTNSGESSAFANTR |
| 15 | 475734   | Ribulose-1,5-bisphosphate carboxylase/oxygenase large subunit ( <i>Juanulloa aurantiaca</i> ) | 1  | 87 | 1245.6 | FLFC(+57)AEALFK                           |
|    |          |                                                                                               | 2  | 99 | 1261.7 | DITLGFVDLLR                               |
|    |          |                                                                                               | 3  | 75 | 737.4  | GGLDFTK                                   |
|    |          |                                                                                               | 4  | 96 | 1546.7 | WSPELAAAC(+57)EVWK                        |
|    |          |                                                                                               | 5  | 97 | 1579.8 | EIVFNFAAVDVLDK                            |
|    |          |                                                                                               | 6  | 80 | 976.5  | AQTETGEIK                                 |
| 16 | 1518139  | Chloroplast heat shock                                                                        | 1  | 94 | 910.4  | FDM(+16)PGLSK                             |

|    |          |                                                                                            |    |    |        |                                      |
|----|----------|--------------------------------------------------------------------------------------------|----|----|--------|--------------------------------------|
|    |          | protein ( <i>L. esculentum</i> )                                                           | 2  | 98 | 928.5  | KVIDVQIN                             |
|    |          |                                                                                            | 3  | 93 | 984.6  | LSLPDNVVK                            |
|    |          |                                                                                            | 4  | 88 | 1005.4 | NYSSYDTR                             |
|    |          |                                                                                            | 5  | 96 | 1087.6 | NGVLFISIPK                           |
|    |          |                                                                                            | 6  | 97 | 1246.7 | VSVENDMLVIK                          |
|    |          |                                                                                            | 7  | 90 | 1262.7 | VSVENDM(+16)LVIK                     |
|    |          |                                                                                            | 8  | 99 | 1313.6 | LFEDTMTFPGR                          |
|    |          |                                                                                            | 9  | 97 | 1329.6 | LFEDTM(+16)TFPGR                     |
|    |          |                                                                                            | 10 | 96 | 1611.7 | TPWDIHDDENEIK                        |
|    |          |                                                                                            | 11 | 96 | 1962.9 | MALDVSPFGVLDPMSPMR                   |
|    |          |                                                                                            | 12 | 96 | 2366.1 | DTSVDVHHSSAQGGNNQGTAVER              |
| 17 | 3336892  | Hsp20.0 protein ( <i>L. peruvianum</i> )                                                   | 1  | 95 | 901.5  | VLQISGER                             |
|    |          |                                                                                            | 2  | 94 | 974.5  | FRLPENAK                             |
|    |          |                                                                                            | 3  | 74 | 1057.5 | ETPEAHVFK                            |
|    |          |                                                                                            | 4  | 99 | 1445.7 | ASMENGLTVTVPK                        |
|    |          |                                                                                            | 5  | 96 | 1461.7 | ASM(+16)ENGLTVTVPK                   |
|    |          |                                                                                            | 6  | 97 | 1947.9 | STSVDFPFSIDVDFPFK                    |
|    |          |                                                                                            | 7  | 74 | 3916.8 | STSVDFPFSIDVDFPFKELGFTVSNSETSAFANTR  |
| 18 | 218312   | Chloroplast elongation factor TuB (EF-TuB) ( <i>N. sylvestris</i> )                        | 1  | 97 | 1081.6 | FEALVYVLK                            |
|    |          |                                                                                            | 2  | 92 | 1307.6 | YDEIDAAPEER                          |
|    |          |                                                                                            | 3  | 91 | 1354.6 | NTTVTGVEMFQK                         |
|    |          |                                                                                            | 4  | 91 | 1370.6 | NTTVTGVEM(+16)FQK                    |
|    |          |                                                                                            | 5  | 85 | 2108   | VNM(+16)VVELIMPVAC(+57)EQGM(+16)R    |
|    |          |                                                                                            | 6  | 99 | 1435.7 | KYDEIDAAPEER                         |
|    |          |                                                                                            | 7  | 77 | 1444.8 | QVGVPMVVFLNK                         |
|    |          |                                                                                            | 8  | 86 | 721.4  | TTDVTGK                              |
|    |          |                                                                                            | 9  | 89 | 1460.8 | QVGVPM(+16)VVFLNK                    |
|    |          |                                                                                            | 10 | 87 | 823.5  | EHILLAK                              |
|    |          |                                                                                            | 11 | 95 | 1699.9 | ILDEAMAGDNVGLLLR                     |
|    |          |                                                                                            | 12 | 95 | 1715.9 | ILDEAM(+16)AGDNVGLLLR                |
|    |          |                                                                                            | 13 | 89 | 872.5  | TVGAGVIQK                            |
|    |          |                                                                                            | 14 | 97 | 1810.9 | GITINTATVEYETENR                     |
|    |          |                                                                                            | 15 | 80 | 2673.3 | NMITGAAQMDGAILVVSAGDGPMPQTK          |
|    |          |                                                                                            | 16 | 82 | 2705.3 | NM(+16)ITGAAQMDGAILVVSAGDGP(+16)PQTK |
| 21 | 809113   | 33kDa precursor protein of oxygen-evolving complex ( <i>S. tuberosum</i> )                 | 1  | 98 | 964.6  | VPFLFTIK                             |
|    |          |                                                                                            | 2  | 95 | 1220.6 | IQGIWYAQLE                           |
|    |          |                                                                                            | 3  | 95 | 1252.6 | RLTYDEIQSK                           |
|    |          |                                                                                            | 4  | 90 | 1328.6 | FC(+57)LEPTSFTVK                     |
|    |          |                                                                                            | 5  | 92 | 1417.7 | GDEEELQKENVK                         |
|    |          |                                                                                            | 6  | 91 | 1456.7 | KFC(+57)LEPTSFTVK                    |
|    |          |                                                                                            | 7  | 85 | 2294.1 | FEEKDGIDYAAVTVQLPgger                |
|    |          |                                                                                            | 8  | 82 | 2298.2 | QLVASGKPEFSFGFLVPSYR                 |
|    |          |                                                                                            | 9  | 99 | 1562.7 | GGSTGYDNAVALPAGGR                    |
|    |          |                                                                                            | 10 | 90 | 791.4  | NTASLTGK                             |
|    |          |                                                                                            | 11 | 78 | 2381.1 | GTGTANQC(+57)PTIEGGVGSFAFKPGK        |
|    |          |                                                                                            | 12 | 99 | 1760.9 | DGIDYAAVTVQLPgger                    |
|    |          |                                                                                            | 13 | 91 | 906.4  | NSAPDFQK                             |
|    |          |                                                                                            | 14 | 91 | 1096.5 | LTYDEIQSK                            |
|    |          |                                                                                            | 15 | 97 | 2310.1 | LYTYLDEIEGPFVSPDGTVK                 |
| 22 | 5257554  | Cytosolic ascorbate peroxidase ( <i>Fragaria x ananassa</i> )                              | 1  | 92 | 1347.7 | LAWHSAGTYDVK                         |
|    |          |                                                                                            | 2  | 91 | 1403.6 | C(+57)YPTVSEYK                       |
|    |          |                                                                                            | 3  | 81 | 936.4  | LSELGFAEA                            |
| 23 | 20018    | Ribosomal protein L12-1 ( <i>N. tabacum</i> )                                              | 1  | 89 | 898.5  | ELIEGLPK                             |
|    |          |                                                                                            | 2  | 93 | 1405.7 | EGVSKDEAEDAKK                        |
|    |          |                                                                                            | 3  | 73 | 816.5  | ALTSLALK                             |
|    |          |                                                                                            | 4  | 90 | 1690.8 | TEFDVVIDEVPSNAR                      |
|    |          |                                                                                            | 5  | 73 | 898.5  | ELIEGLPK                             |
|    |          |                                                                                            | 6  | 96 | 1914   | VVQLGDEISNLTADAQK                    |
|    |          |                                                                                            | 7  | 91 | 1007.5 | LVEYLQDK                             |
| 24 | 1149571  | Mitochondrial elongation factor Tu ( <i>Arabidopsis thaliana</i> )                         | 1  | 93 | 899.5  | ELLSFYK                              |
|    |          |                                                                                            | 2  | 85 | 1021.5 | AIAFDEIDK                            |
|    |          |                                                                                            | 3  | 83 | 1114.5 | STVTGVEM(+16)FK                      |
|    |          |                                                                                            | 4  | 77 | 1460.8 | QVGVPSLVC(+57)FLNK                   |
|    |          |                                                                                            | 5  | 99 | 1575.8 | AIAFDEIDKAPEEK                       |
|    |          |                                                                                            | 6  | 82 | 1632.8 | LMDAVDEYIPDPVR                       |
|    |          |                                                                                            | 7  | 87 | 1648.8 | LM(+16)DAVDEYIPDPVR                  |
|    |          |                                                                                            | 8  | 72 | 1667.9 | ILDNGQAGDNVGLLLR                     |
|    |          |                                                                                            | 9  | 77 | 919.5  | TTLTAATK                             |
|    |          |                                                                                            | 10 | 78 | 927.5  | VELPENVK                             |
| 25 | 71151986 | Nascent polypeptide-associated complex subunit alpha-like protein 3 ( <i>A. thaliana</i> ) | 1  | 97 | 1659.9 | DIELVM(+16)TQAGVSKPR                 |
|    |          |                                                                                            | 2  | 99 | 1484.7 | SPASDITYVIFGEAK                      |
|    |          |                                                                                            | 3  | 95 | 1643.9 | DIELVMTQAGVSKPR                      |
|    |          |                                                                                            | 4  | 97 | 1921.9 | IEDLSSQLQSQAEEQFK                    |

**Supplementary table 2:** The type and relation of protein-protein interactions in biological networks generated for salt stress. This table corresponds to the Figure 8A.

| Type       | Relation                                                         | Ref. | Type         | Relation                                     | Ref. |
|------------|------------------------------------------------------------------|------|--------------|----------------------------------------------|------|
| Regulation | SOD --+> differentiation                                         | 1    | Regulation   | Antioxidant ---> photosynthesis              | 10   |
| Regulation | Antioxidant ---> regulation of signal transduction               | 5    | Regulation   | APX ---> hypersensitive response             | 2    |
| Regulation | SOD ---> oxidative stressed                                      | 4    | Regulation   | APX ---> GPX                                 | 2    |
| Regulation | APX --+> RPS6K                                                   | 1    | Regulation   | APX ---> photophosphorylation                | 2    |
| Regulation | PSII ---> photosynthesis                                         | 75   | Regulation   | APX1 ---> regulation of signal transduction  | 3    |
| Regulation | Superoxide dismutase ---> GPX                                    | 2    | Regulation   | Superoxide dismutase ---> oxidative stressed | 3    |
| Regulation | Peroxynitrite ---  APX                                           | 1    | Regulation   | SOD ---> systemic acquired resistance        | 2    |
| Regulation | Antioxidant ---> Plant development                               | 2    | Regulation   | RubisCO ---> photosynthesis                  | 202  |
| Regulation | cAPX ---> hypersensitive response                                | 2    | Regulation   | SOD ---> photosynthesis                      | 8    |
| Regulation | APX ---> photosynthesis                                          | 4    | Regulation   | antioxidant ---> necrosis                    | 5    |
| Regulation | Antioxidant ---> oxidative stressed                              | 29   | Regulation   | APX ---> plant defense                       | 2    |
| Regulation | PSII ---> photorespiration                                       | 7    | Regulation   | Antioxidant ---> salinity response           | 2    |
| Regulation | Superoxide dismutase ---> photosynthesis                         | 6    | Regulation   | SOD ---> necrosis                            | 1    |
| Regulation | PSII ---> photoinhibition                                        | 35   | Regulation   | cAPX ---> regulation of signal transduction  | 1    |
| Regulation | oxygen ---> photoinhibition                                      | 3    | Regulation   | Antioxidant ---> fruit ripening              | 2    |
| Regulation | Superoxide dismutase --+> 3-(imidazol-5-yl)lactate dehydrogenase | 1    | MolSynthesis | Antioxidant ---> ascorbate                   | 5    |
| Regulation | SOD ---> salinity response                                       | 2    | MolSynthesis | APX ---> ascorbate                           | 7    |
| Regulation | Antioxidant ---> plant defense                                   | 11   | MolSynthesis | APX ---> ascorbic acid                       | 4    |
| Regulation | Saline --+> MUJ8.3                                               | 1    | MolSynthesis | Antioxidant ---> lipids                      | 4    |
| Regulation | APX2 ---> photosynthesis                                         | 2    | MolSynthesis | APX ---> oxygen                              | 7    |
| Regulation | APX2 --+> APX                                                    | 1    | MolSynthesis | SOD ---> oxygen                              | 6    |
| Regulation | L-ascorbate oxidase ---> plant growth                            | 2    | MolSynthesis | Antioxidant ---> H2O2                        | 3    |
| Regulation | SOD ---> GPX                                                     | 2    | MolSynthesis | APX ---> lipid                               | 1    |
| Regulation | Saline --+> APX                                                  | 1    | Regulation   | RubisCO ---> oxidative stressed              | 1    |
| Regulation | APX1 --+> APX                                                    | 1    | Regulation   | Copper --+> SOD                              | 1    |
| Regulation | Superoxide dismutase --+> AT4G35090                              | 1    | Expression   | Saline --+> SOD                              | 1    |

**Supplementary table 3:** The type and relation of protein-protein interactions in biological networks generated for salt stress. This table corresponds to the Figure 8B.

| Type         | Relation                                    | Ref. | Type         | Relation                      | Ref. |
|--------------|---------------------------------------------|------|--------------|-------------------------------|------|
| Regulation   | PSII ---> photosynthesis                    | 75   | Regulation   | OEC ---> photoinhibition      | 1    |
| Regulation   | PSII ---> photodamage                       | 19   | MolTransport | PS II ---> oxygen             | 1    |
| Regulation   | PSII ---> electron transfer                 | 29   | Expression   | At1g17030 --> PSII            | 1    |
| Regulation   | PSII ---> photoinhibition                   | 35   | Regulation   | PS II ---> respiration        | 1    |
| Regulation   | PS II ---> photoinhibition                  | 6    | MolTransport | PSII ---> DCBQ                | 1    |
| Regulation   | PSII ---> reductive pentose-phosphate cycle | 3    | Regulation   | OEC ---> mutagenesis          | 1    |
| Regulation   | ATP synthase ---> photosynthesis            | 11   | Binding      | OEC ---- PSII                 | 1    |
| Regulation   | PS II ---> photosynthesis                   | 10   | Regulation   | PSII ---> absorption of light | 1    |
| Regulation   | PS II ---> electron transfer                | 7    | Regulation   | PS II ---> mutagenesis        | 2    |
| Regulation   | PSII ---> DNA recombination                 | 3    | Binding      | GTPase activity ---- PSII     | 1    |
| MolSynthesis | PSII ---> water                             | 35   | Expression   | OEC23 --> PSII                | 1    |
| MolSynthesis | PSII ---> oxygen                            | 14   | MolSynthesis | OEC ---> chlorophyll          | 1    |
| Regulation   | OEC ---> photosynthesis                     | 1    | MolTransport | PS II ---> Mn2+               | 1    |
| MolSynthesis | OEC ---> water                              | 1    |              |                               |      |

**Supplementary table 4:** Fold changes in tomato seedling under salt stress as compared with non-salt treated controls after 2 different staining methods.

| <b>Fold changes in tomato seedling under salt stress as compared with non-saline controls</b> |                                      |                              |
|-----------------------------------------------------------------------------------------------|--------------------------------------|------------------------------|
| Spot number                                                                                   | Silver staining (Shown in our paper) | Collodial Coomassie staining |
| 4 (F144 radicles)                                                                             | (+) $18.3 \pm 2.17$                  | (+) $16.2 \pm 2.89$          |
| 6 (F144 radicles)                                                                             | (+) $7.8 \pm 0.37$                   | (+) $7.6 \pm 0.24$           |
| 7 (F144 radicles)                                                                             | (+) $10.5 \pm 0.19$                  | (+) $9.1 \pm 0.42$           |
| 9 (F144 radicles)                                                                             | (+) $2.0 \pm 0.09$                   | (+) $2.3 \pm 0.36$           |
| 13 (Patio hypocotyls)                                                                         | (-) $\infty$                         | (-) $\infty$                 |
| 17 (F144 hypocotyls)                                                                          | (+) $2.6 \pm 0.13$                   | (+) $2.3 \pm 0.38$           |
| 18 (Patio hypocotyls)                                                                         | (-) $2.2 \pm 0.26$                   | (-) $1.9 \pm 0.15$           |
| 19 (F144 radicles)                                                                            | (+) $3.8 \pm 0.13$                   | (+) $3.2 \pm 0.25$           |
| 22 (F144 radicles)                                                                            | (+) $\infty$                         | (+) $\infty$                 |
| 25 (F144 hypocotyls)                                                                          | (-) $3.9 \pm 0.25$                   | (-) $3.3 \pm 0.29$           |
